# Supplementary material for: Insights from the compositional evolution of a multi-coloured, zoned tourmaline from the Cruzeiro pegmatite, Minas Gerais, Brazil
Source: Copernicus journal article supplement (doi:10.5194/ejm-37-1-2025), 2025-01-06
Supplement: Supplementary file 1 [file ejm-37-1-2025-supplement.pdf]

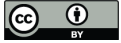

*Supplement of*

## **Insights from the compositional evolution of a multi-coloured, zoned tourmaline from the Cruzeiro pegmatite, Minas Gerais, Brazil**

**Giovanni B. Andreozzi et al.**

*Correspondence to:* Giovanni B. Andreozzi ([gianni.andreozzi@uniroma1.it](mailto:gianni.andreozzi@uniroma1.it))

The copyright of individual parts of the supplement might differ from the article licence.

## 1 **S1. Mössbauer data and Fe speciation**

2 Room temperature  $^{57}\text{Fe}$  Mössbauer spectra of the four tourmaline samples are typical of  
3 paramagnetic silicates and show two main absorptions in the region from -1 to +3 mm/s. The  
4 spectra were deconvoluted using Lorentzian doublets based on previous experience and in  
5 agreement with models already used in the existing literature (e.g., Andreozzi et al., 2008;  
6 Bosi et al., 2015). Quantification of  $\text{Fe}^{3+}/\text{Fe}_{\text{Tot}}$  ratios was obtained through evaluation of the  
7 absorption area of the refined doublets. The four doublets assigned to  $\text{Fe}^{2+}$  have  $\delta$  values in the  
8 range 1.0÷1.1 mm/s and are distinguished by their quadrupole splitting values:  $\Delta E_{\text{Q}} \sim 2.6, 2.3,$   
9 2.0 and 1.4 mm/s (Table S1).

10 The first three doublets, conventionally labelled *Y1*, *Y2* and *Y3* are interpreted as  $\text{Fe}^{2+}$  at the *Y*  
11 sites with different nearest and next-nearest neighbour coordination environments and may  
12 represent up to ~100% of  $\text{Fe}_{\text{Tot}}$  (Fig. S1). The fourth  $\text{Fe}^{2+}$  doublet, required to satisfactorily  
13 model the absorption for T2, T3 and T4 samples, is interpreted as  $\text{Fe}^{2+}$  at a different  
14 crystallographic site of area up to 29% of the  $\text{Fe}_{\text{Tot}}$  (in T4). According to the multianalytical  
15 approach results, this doublet is compatible with  $\text{Fe}^{2+}$  at the *Z* site. An additional, low intensity  
16 doublet –centred at  $\delta \leq 0.3$  mm/s and assigned to  $^{\text{Y}}\text{Fe}^{3+}$  – was introduced to improve the fit for  
17 samples T3 and T4, but its absorption was too low ( $\leq 4\%$  of the  $\text{Fe}_{\text{Tot}}$ ) for its hyperfine  
18 parameters to be reliable.

19

**Table S1.** Room temperature  $^{57}\text{Fe}$  Mössbauer parameters and Fe site assignment for the selected fragments of a multi-coloured, zoned tourmaline single crystal from the Cruzeiro pegmatite (Minas Gerais, Brazil)

| Sample | $\delta$ | $\Delta E_Q$ | $\Gamma$ | Assignment            | Area (%) |
|--------|----------|--------------|----------|-----------------------|----------|
| T1     | 1.08     | 2.53         | 0.28     | $\text{Fe}^{2+}$ (Y1) | 35       |
|        | 1.10     | 2.31         | 0.26     | $\text{Fe}^{2+}$ (Y2) | 37       |
|        | 1.16     | 1.98         | 0.56     | $\text{Fe}^{2+}$ (Y3) | 28       |
| T2     | 1.09     | 2.49         | 0.28     | $\text{Fe}^{2+}$ (Y1) | 39       |
|        | 1.10     | 2.21         | 0.36     | $\text{Fe}^{2+}$ (Y2) | 44       |
|        | 1.04     | 1.41         | 0.56     | $\text{Fe}^{2+}$ (Y3) | 17       |
| T3*    | 1.10     | 2.51         | 0.38     | $\text{Fe}^{2+}$ (Y1) | 34       |
|        | 1.10     | 2.25         | 0.28     | $\text{Fe}^{2+}$ (Y2) | 24       |
|        | 1.10     | 1.90         | 0.38     | $\text{Fe}^{2+}$ (Y3) | 16       |
|        | 1.00     | 1.38         | 0.68     | $\text{Fe}^{2+}$ (Z)  | 23       |
|        | 0.30     | 0.50         | 0.60     | $\text{Fe}^{3+}$ (Y)  | 3        |
| T4     | 1.10     | 2.56         | 0.24     | $\text{Fe}^{2+}$ (Y1) | 23       |
|        | 1.09     | 2.34         | 0.24     | $\text{Fe}^{2+}$ (Y2) | 27       |
|        | 1.07     | 2.07         | 0.29     | $\text{Fe}^{2+}$ (Y3) | 17       |
|        | 1.07     | 1.47         | 0.63     | $\text{Fe}^{2+}$ (Z)  | 29       |
|        | 0.19     | 0.12         | 0.22     | $\text{Fe}^{3+}$ (Y)  | 4        |

*Note:* errors were estimated at about  $\pm 0.02$  mm/s for isomer shift ( $\delta$ ), quadrupole splitting ( $\Delta E_Q$ ) and peak width ( $\Gamma$ ), and about  $\pm 3$  % for doublets areas.  
\*Data from Bosi et al. (2015)

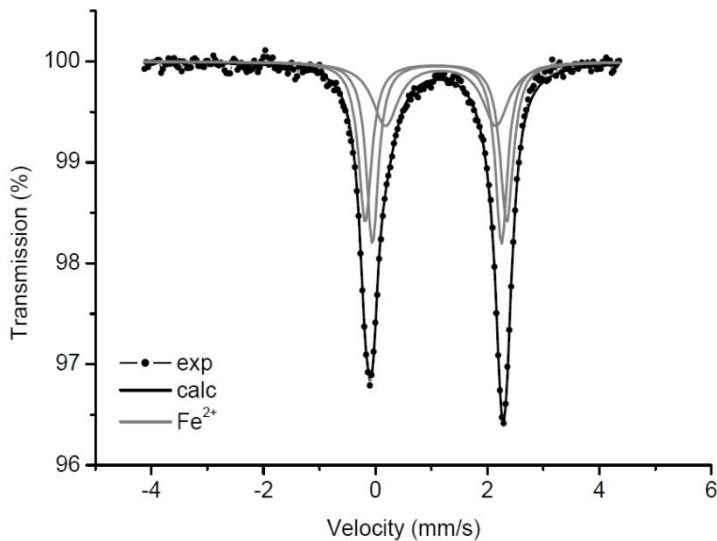

**Figure S1:** Tourmaline sample T1 Mössbauer spectrum at room temperature

43 **S2. Single-crystal X-ray diffraction data**

44 **Table S2.** Single-crystal X-ray diffraction data for the selected fragments of a multi-coloured, zoned tourmaline  
 45 from the Cruzeiro pegmatite (Minas Gerais, Brazil)

| Sample                      | T1                  | T2                  | T3*                 | T4                  |
|-----------------------------|---------------------|---------------------|---------------------|---------------------|
| Crystal size (mm)           | 0.25 × 0.30 × 0.40  | 0.30 × 0.40 × 0.40  | 0.20 × 0.20 × 0.20  | 0.20 × 0.25 × 0.30  |
| <i>a</i> (Å)                | 15.8984(2)          | 15.9315(3)          | 15.9801(2)          | 15.9688(3)          |
| <i>c</i> (Å)                | 7.1226(1)           | 7.1286(1)           | 7.1577(1)           | 7.1698(1)           |
| <i>V</i> (Å <sup>3</sup> )  | 1559.11(4)          | 1566.92(6)          | 1582.93(5)          | 1583.37(6)          |
| Reciprocal space range      | -26 ≤ <i>h</i> ≤ 24 | -22 ≤ <i>h</i> ≤ 26 | -19 ≤ <i>h</i> ≤ 26 | -19 ≤ <i>h</i> ≤ 26 |
| <i>hkl</i>                  | -26 ≤ <i>k</i> ≤ 19 | -25 ≤ <i>k</i> ≤ 23 | -25 ≤ <i>k</i> ≤ 18 | -26 ≤ <i>k</i> ≤ 26 |
|                             | -11 ≤ <i>l</i> ≤ 19 | -6 ≤ <i>l</i> ≤ 11  | -8 ≤ <i>l</i> ≤ 11  | -11 ≤ <i>l</i> ≤ 12 |
| Number reflections          | 7503                | 7519                | 7626                | 7532                |
| Unique reflections          | 1683                | 1431                | 1565                | 1771                |
| <i>R</i> <sub>int</sub> (%) | 1.44                | 1.45                | 1.74                | 1.41                |
| Extinction coefficient      | 0.0020(2)           | 0.0067(3)           | 0.0032(2)           | 0.0038(3)           |
| Flack parameter             | 0.21(2)             | 0.165(19)           | 0.021(17)           | 0.052(16)           |
| <i>wR</i> 2 (%)             | 4.47                | 4.13                | 3.94                | 3.68                |
| <i>R</i> 1 (%) all data     | 1.80                | 1.62                | 1.60                | 1.34                |
| GooF                        | 1.061               | 1.073               | 1.118               | 1.097               |

46 *Notes:* *R*<sub>int</sub> = merging residual value for equivalents; *R*1 = discrepancy index, calculated from *F*-data; *wR*2 =  
 47 weighted discrepancy index, calculated from *F*<sup>2</sup>-data; GooF = goodness of fit; Radiation, MoKα = 0.71073 Å.  
 48 Data collection temperature = 293 K. Range for data collection, 2θ = 5-74°. Space group *R*3*m*; *Z* = 3.  
 49 Absorption correction method: SADABS; Refinement method: Full-matrix last-squares on *F*<sup>2</sup>; Structural  
 50 refinement program: SHELXL-2013  
 51 \*Data from Bosi et al. 2015

52  
 53  
 54  
 55  
 56  
 57  
 58  
 59  
 60  
 61  
 62  
 63  
 64  
 65  
 66

67 **Table S3.** Fractional atom coordinates ( $x$ ,  $y$ ,  $z$ ) and equivalent isotropic displacement parameters ( $U_{\text{eq}}$  in  $\text{\AA}^2$ ) for  
68 the selected fragments of a multi-coloured, zoned tourmaline from the Cruzeiro pegmatite (Minas Gerais, Brazil)

|    |                 | T1          | T2          | T3*         | T4          |
|----|-----------------|-------------|-------------|-------------|-------------|
| X  | $x$             | 0           | 0           | 0           | 0           |
|    | $y$             | 0           | 0           | 0           | 0           |
|    | $z$             | 0.2367(4)   | 0.2343(4)   | 0.2283(4)   | 0.2303(3)   |
|    | $U_{\text{eq}}$ | 0.0232(7)   | 0.0242(8)   | 0.0244(8)   | 0.0234(7)   |
| Y  | $x$             | 0.12397(5)  | 0.12469(4)  | 0.12476(3)  | 0.12464(2)  |
|    | $y$             | 0.06198(3)  | 0.06235(2)  | 0.06238(2)  | 0.06232(2)  |
|    | $z$             | 0.62798(12) | 0.62660(11) | 0.62790(8)  | 0.62917(7)  |
|    | $U_{\text{eq}}$ | 0.00894(18) | 0.00910(14) | 0.00854(10) | 0.00865(10) |
| Z  | $x$             | 0.29763(4)  | 0.29803(3)  | 0.29854(3)  | 0.29842(2)  |
|    | $y$             | 0.26077(4)  | 0.26118(3)  | 0.26169(3)  | 0.26171(3)  |
|    | $z$             | 0.61149(10) | 0.61134(9)  | 0.61082(8)  | 0.61110(7)  |
|    | $U_{\text{eq}}$ | 0.00593(10) | 0.00579(9)  | 0.00571(11) | 0.00577(10) |
| T  | $x$             | 0.10950(9)  | 0.10976(8)  | 0.19196(2)  | 0.11008(6)  |
|    | $y$             | 0.21899(18) | 0.21953(16) | 0.18998(3)  | 0.22016(13) |
|    | $z$             | 0.4557(4)   | 0.4556(3)   | 0           | 0.4553(3)   |
|    | $U_{\text{eq}}$ | 0.0063(3)   | 0.0066(3)   | 0.00515(9)  | 0.0066(3)   |
| B  | $x$             | 0.19197(3)  | 0.19200(3)  | 0.11019(7)  | 0.19185(2)  |
|    | $y$             | 0.18997(3)  | 0.18999(3)  | 0.22038(15) | 0.18990(2)  |
|    | $z$             | 0           | 0           | 0.4551(3)   | 0           |
|    | $U_{\text{eq}}$ | 0.00481(8)  | 0.00501(8)  | 0.0070(3)   | 0.00513(8)  |
| O1 | $x$             | 0           | 0           | 0           | 0           |
|    | $y$             | 0           | 0           | 0           | 0           |
|    | $z$             | 0.7857(6)   | 0.7840(6)   | 0.7813(5)   | 0.7790(4)   |
|    | $U_{\text{eq}}$ | 0.0574(16)  | 0.0531(14)  | 0.0343(8)   | 0.0273(6)   |
| O2 | $x$             | 0.06081(7)  | 0.06116(6)  | 0.06170(5)  | 0.06159(5)  |
|    | $y$             | 0.12162(14) | 0.12232(12) | 0.12340(11) | 0.12317(9)  |
|    | $z$             | 0.4843(3)   | 0.4843(3)   | 0.4859(2)   | 0.4862(2)   |
|    | $U_{\text{eq}}$ | 0.0165(4)   | 0.0165(4)   | 0.0153(3)   | 0.0139(3)   |
| O3 | $x$             | 0.26888(14) | 0.26917(13) | 0.26830(12) | 0.26730(11) |
|    | $y$             | 0.13444(7)  | 0.13459(7)  | 0.13415(6)  | 0.13365(6)  |
|    | $z$             | 0.5096(3)   | 0.5093(3)   | 0.5095(2)   | 0.5101(2)   |
|    | $U_{\text{eq}}$ | 0.0094(3)   | 0.0096(3)   | 0.0121(3)   | 0.0128(2)   |
| O4 | $x$             | 0.09310(7)  | 0.09313(6)  | 0.09322(5)  | 0.09324(5)  |
|    | $y$             | 0.18621(13) | 0.18626(12) | 0.18644(11) | 0.18648(10) |
|    | $z$             | 0.0715(2)   | 0.0703(2)   | 0.0683(2)   | 0.06897(19) |
|    | $U_{\text{eq}}$ | 0.0077(3)   | 0.0083(3)   | 0.0099(2)   | 0.0098(2)   |
| O5 | $x$             | 0.18644(13) | 0.18670(12) | 0.18710(11) | 0.18628(10) |
|    | $y$             | 0.09322(6)  | 0.09335(6)  | 0.09355(6)  | 0.09314(5)  |
|    | $z$             | 0.0936(2)   | 0.0927(2)   | 0.0913(2)   | 0.09127(19) |
|    | $U_{\text{eq}}$ | 0.0078(3)   | 0.0086(3)   | 0.0102(2)   | 0.0101(2)   |
| O6 | $x$             | 0.19715(8)  | 0.19758(8)  | 0.19793(7)  | 0.19737(7)  |
|    | $y$             | 0.18698(8)  | 0.18730(8)  | 0.18757(7)  | 0.18712(7)  |
|    | $z$             | 0.77587(18) | 0.77556(18) | 0.77571(15) | 0.77653(14) |
|    | $U_{\text{eq}}$ | 0.00701(19) | 0.00708(18) | 0.00864(17) | 0.00872(16) |

|    |             |             |             |             |             |    |
|----|-------------|-------------|-------------|-------------|-------------|----|
|    |             |             |             |             |             | 69 |
| O7 | x           | 0.28560(8)  | 0.28551(8)  | 0.28511(7)  | 0.28501(6)  | 70 |
|    | y           | 0.28572(8)  | 0.28578(7)  | 0.28568(7)  | 0.28545(6)  | 71 |
|    | z           | 0.08051(17) | 0.08023(16) | 0.07932(14) | 0.07930(13) | 72 |
|    | $U_{eq}$    | 0.00609(18) | 0.00650(17) | 0.00805(17) | 0.00814(15) | 73 |
| O8 | x           | 0.20993(8)  | 0.20989(8)  | 0.20980(7)  | 0.20973(6)  | 74 |
|    | y           | 0.27047(9)  | 0.27052(8)  | 0.27062(8)  | 0.27052(7)  | 75 |
|    | z           | 0.44158(18) | 0.44135(18) | 0.44085(15) | 0.44107(15) | 76 |
|    | $U_{eq}$    | 0.0073(2)   | 0.00780(19) | 0.00931(18) | 0.00938(16) | 77 |
| H3 | x           | 0.258(3)    | 0.258(3)    | 0.268(2)    | 0.260(2)    | 78 |
|    | y           | 0.1290(14)  | 0.1291(13)  | 0.1341(12)  | 0.1298(11)  | 79 |
|    | z           | 0.380(3)    | 0.381(3)    | 0.389(5)    | 0.381(3)    | 80 |
|    | $U_{iso}^a$ | 0.011       | 0.012       | 0.015       | 0.015       | 81 |

78 <sup>a</sup> isotropic ( $U_{iso}$ ) displacement parameters for H3-atom was constrained to have a  $U_{iso}$  1.2  
79 times the  $U_{eq}$  value of the O3 oxygen.

80 \*Data from Bosi et al. (2015)

81

82

83

84 **Table S4.** Selected mean bond distances (Å) and mean atomic numbers (m.a.n.) for  
 85 the selected fragments of a multi-coloured, zoned tourmaline from the Cruzeiro  
 86 pegmatite (Minas Gerais, Brazil)

| Sample   | T1              | T2              | T3*             | T4              |
|----------|-----------------|-----------------|-----------------|-----------------|
| <X-O>    | 2.672           | 2.681           | 2.702           | 2.697           |
| X-m.a.n. | 10.42(13)       | 9.47(10)        | 7.70(1)         | 8.43(7)         |
| <Y-O>    | 2.035           | 2.041           | 2.045           | 2.039           |
| Y-m.a.n. | 13.90(4)        | 16.57(5)        | 20.90(1)        | 19.76(8)        |
| <Z-O>    | 1.907           | 1.909           | 1.917           | 1.920           |
| Z-m.a.n. | 13 <sup>a</sup> | 13 <sup>a</sup> | 13.50(1)        | 13.34(4)        |
| <B-O>    | 1.376           | 1.376           | 1.375           | 1.374           |
| B-m.a.n. | 5 <sup>a</sup>  | 5 <sup>a</sup>  | 5 <sup>a</sup>  | 5 <sup>a</sup>  |
| <T-O>    | 1.619           | 1.620           | 1.622           | 1.620           |
| T-m.a.n. | 14 <sup>a</sup> | 14 <sup>a</sup> | 14 <sup>a</sup> | 14 <sup>a</sup> |

87 <sup>a</sup> Fixed in the final stages of refinement

88 \*\*Data from Bosi et al. (2015)

89

90

91

92

93

94 S3. FTIR and OAS data

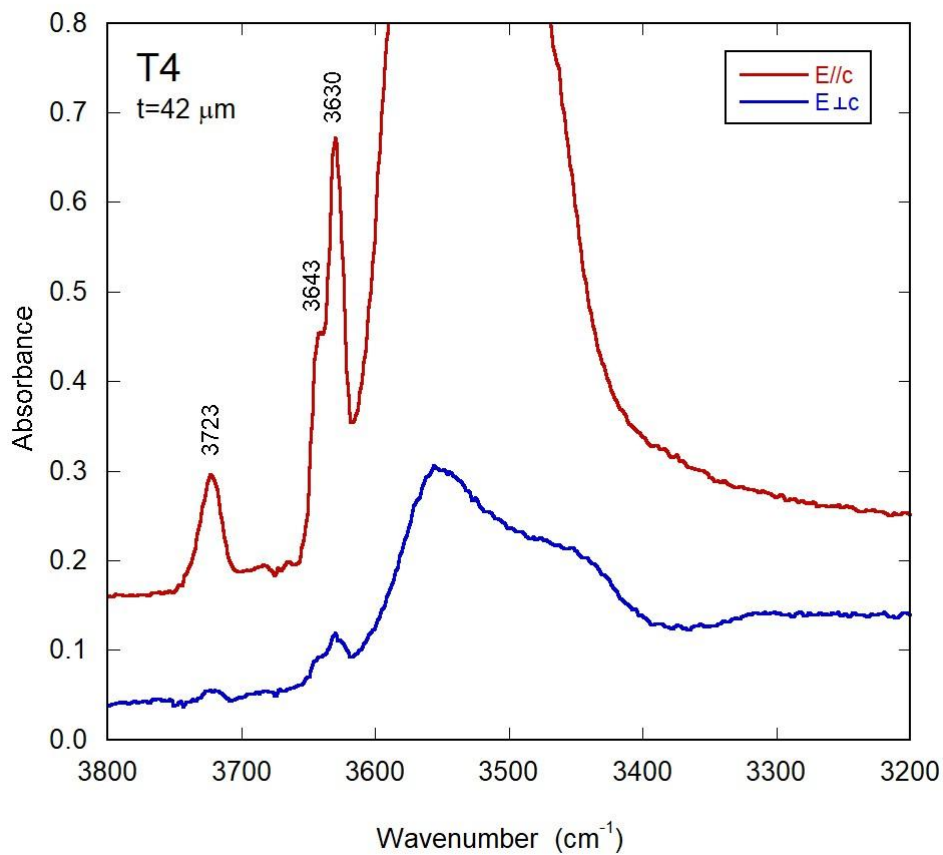

96  
97 **Figure S2: Polarized FTIR spectra perpendicular (E<sub>⊥</sub>c) and parallel (E<sub>||</sub>c) to the c-axis direction of the T4**  
98 **crystal fragment (sample thickness 42 μm) of a colored, zoned tourmaline from the Cruzeiro pegmatite**  
99 **(Minas Gerais, Brazil). Peak positions are indicated.**  
100



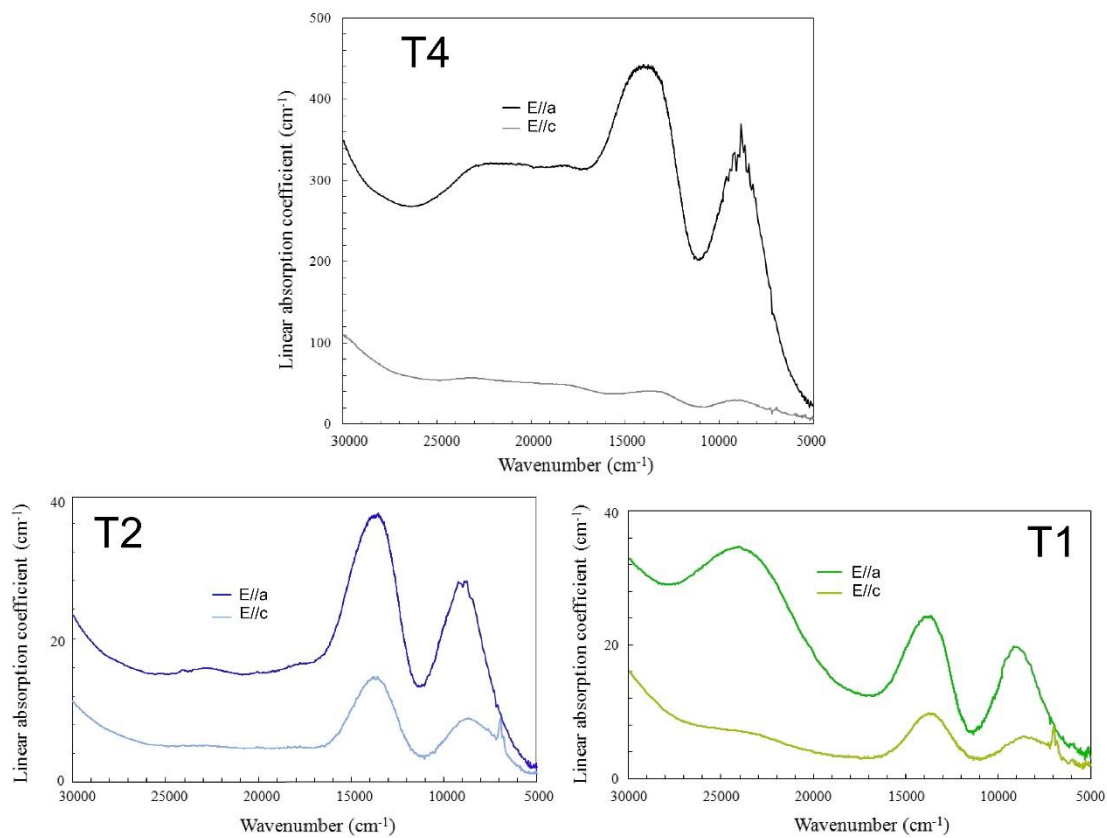

101

102 **Figure S3: Optical absorption spectra polarized perpendicular (E//a) and parallel (E//c) to the c-axis**  
 103 **direction of the T1, T2 and T4 crystal fragments of a colored, zoned tourmaline from the Cruzeiro**  
 104 **pegmatite (Minas Gerais, Brazil). Thickness of all samples: 100  $\mu\text{m}$ .**

105
